# Supplementary material for: p38MAPK/MK2-mediated phosphorylation of RBM7 regulates the human nuclear exosome targeting complex
Source: PubMed Central journal article supplement — RNA. 2015 Feb;21(2):262–78. doi: 10.1261/rna.048090.114 (PMC4338353; doi:10.1261/rna.048090.114), 2015-02

## **SUPPLEMENTARY INFORMATION**

### **p38<sup>MAPK</sup>/MK2-mediated phosphorylation of RBM7 regulates the human nuclear exosome targeting complex**

Christopher Tiedje<sup>1,\*</sup>, Michal Lubas<sup>2,4</sup>, Mohammad Tehrani<sup>1</sup>, Manoj B. Menon<sup>1</sup>, Natalia Ronkina<sup>1</sup>, Simon Rousseau<sup>3,5</sup>, Philip Cohen<sup>3</sup>, Alexey Kotlyarov<sup>1</sup> and Matthias Gaestel<sup>1,\*</sup>

Running title: Stress-dependent stabilization of nuclear ncRNAs

## SUPPLEMENTARY FIGURES

### **S1: Murine Rbm7 and human RBM7 are both *in vitro* and *in vivo* substrates of MK2.**

**A.** Human FLAG-RBM7 was overexpressed in HeLa cells that were treated as indicated. After a FLAG-IP, lysates and precipitates were analyzed by probing for p-PKD, pS136-Rbm7 and FLAG with the respective antibodies. Only anisomycin treatment led to a specific phospho-Rbm7 signal as detected by both the p(S/T)-PKD-substrate and the pS136-Rbm7 antibody. **B.** A radioactive kinase assay with precipitated GFP, GFP-Rbm7 and GFP-Rbm7<sup>S136A</sup> using recombinant MK2 and p38 was performed as in Figure 1C.

### **S2: Subcellular localization of GFP-tagged Rbm7 and Rbm7<sup>S136A</sup> and its potentially enhanced proteasomal degradation**

**A.** Both N-terminal tagged GFP-fusion proteins were overexpressed in HeLa cells and visualized by live-cell microscopy (DM IL LED, Leica Microsystems) upon anisomycin stimulation and in combination with p38<sup>MAPK</sup>-inhibition using BIRB796. No change in the localization of GFP-fusion proteins was observed. GFP-Rbm7 and GFP-Rbm7<sup>S136A</sup> remained exclusively nuclear throughout stimulation. In strongly overexpressing cells, GFP-Rbm7 and GFP-Rbm7<sup>S136A</sup> did accumulate in distinct spots. This effect was independent of stress stimulation. The magnification was 20-fold. **B.** A potentially enhanced phosphorylation-driven proteasomal degradation of endogenous RBM7 was ruled out by analyzing RBM7 protein levels in anisomycin-stimulated HeLa cells in combination with MG-132 mediated proteasome inhibition (20μM). The BIRB796-induced restoration of the RBM7 signal was not achieved by MG-132 indicating no increased proteasomal degradation of RBM7 upon anisomycin-stimulation.

### **S3: The interaction of exogenous Rbm7 and exogenous ZCCHC8 with their endogenous interacting partners are not altered upon anisomycin-stimulation**

**A.** FLAG-tagged ZCCHC8 was expressed together with GFP, GFP-Rbm7 or GFP-Rbm7<sup>S136A</sup> in non-stimulated or anisomycin-stimulated HeLa cells. Upon pulldown of FLAG-ZCCHC8, no changes in GFP-Rbm7 or GFP-Rbm7<sup>S136A</sup> association were observed. GFP alone did not interact with FLAG-ZCCHC8. **B.** GFP-ZCCHC8 was expressed in HeLa cells that were stimulated as indicated. The association of endogenous RBM7 (indicated by an arrow) was monitored by GFP-pulldown. The precipitation of GFP-ZCCHC8 was not as effective as it was for GFP-Rbm7 (see Supplementary Figure S3C). Nevertheless, endogenous RBM7 was

co-purifying with exogenous GFP-ZCCHC8. Notably, cell stimulation with anisomycin once again weakened the intensity of the RBM7 signal. The intense upper band in the RBM7 pulldown-blot was unspecific, because in lysates it was only present in GFP-ZCCHC8 overexpressing cells. We speculate that the ZCCHC8 antibody could cross-react with ZCCHC8-fragments. **C.** GFP-Rbm7 and GFP-Rbm7<sup>S136A</sup> were expressed in HeLa cells. The cells were stimulated as indicated and GFP-fusion proteins were precipitated using a GFP-Nanotrap. The association of endogenous ZCCHC8 with the GFP-fusion proteins was not altered under any condition. Interaction with endogenous CBP80 was partly lost upon stimulation and was not restored upon p38<sup>MAPK</sup>-inhibitor treatment indicating a p38-independent effect.

#### **S4: RBM7-binding to RNAs is abrogated by stress**

**A.** GFP-Rbm7 or GFP-Rbm7<sup>S136A</sup> expressed in HeLa cells were cross-linked (CL) to cellular RNA using UV-C light prior to precipitation (CLIP). RNaseI treatment was not sufficient to fully digest RNAs cross-linked to Rbm7 even at high concentrations and resulted in a smear of various RNA-Rbm7 cross-linking products. GFP-only expressing cells were used as control. Here, no cross-link product was detectable indicating that Rbm7 was specifically bound to RNAs. **B.** Replicate of Figure 2B showing the partial rescue of the loss of Rbm7 RNA-binding capacity by introducing the S136A mutation. Quantifications for both replicates are shown in relation to the anisomycin treated wildtype protein sample (GFP-Rbm7). **C.** The loss of RNA-binding capacity of wildtype Rbm7 was also in part reversed by BIRB796-mediated p38<sup>MAPK</sup>-inhibition before anisomycin stimulation (2 replicates). The effect was similar to what was seen with the mutant Rbm7<sup>S136A</sup> protein in Figure 2B and Supplementary Figure S4B. Quantifications of the Rbm7-bound RNA signals from the autoradiographs in relation to the anti-GFP signals from the same membrane are shown. The signal for anisomycin-treated HeLa cells expressing GFP-Rbm7 was set to 1. Stars indicate  $p < 0.01$ .

#### **S5: RBM7 is not an AU-rich element binding protein**

**A.** GFP, GFP-Rbm7 (or as a positive control GFP-TTP) were overexpressed in HEK293T cells. 10µg of each lysate was incubated with a specific AU-rich- or a random control-RNA (DY681- and DY781-labelled). Only GFP-TTP showed high-affinity *in vitro* binding to an AU-rich-specific RNA. Expression of the proteins was monitored by anti-GFP Western blot. **B.** The consequences of GFP-Rbm7 overexpression on the expression of different AU-rich luciferase reporter constructs were analyzed in HEK293T cells. To this end, the complete

3'UTR of murine TNF $\alpha$  and human IL-6 was subcloned into Firefly-coding vector just downstream of the Luciferase coding sequence. For TNF $\alpha$  a mutant lacking the AU-rich element was cloned and also analyzed. For normalization a renilla-luciferase-coding vector was co-transfected. The relative firefly expression level of GFP-transfected cells was set to 1. The TNF $\alpha$  3'UTR strongly suppresses reporter expression and can only be partly restored by the AU-rich element deletion. Results are shown as mean of three independent experiments.

**S6: Different p38<sup>MAPK</sup>-inhibitors can down-regulate PROMPTs RNA levels to a similar extend, but GSK-3 inhibition does not**

**A.** proRBM39, proEXT1, proIFNAR1 and proDNAJB4 RNA levels were measured in HeLa cells upon anisomycin-stimulation and in combination with the three known p38<sup>MAPK</sup>-inhibitors BIRB796, SB202190 and SB203580. All three inhibitors decreased the proRBM39, proEXT1 and proDNAJB4 levels. SB203580 did affect proIFNAR1 RNA transcript. **B.** HeLa cells stimulated with anisomycin for 2h were pre-treated for 1h with LiCl (15mM final) and lysates were assayed for endogenous ZCCHC8, RBM7 and GAPDH as a loading control. Furthermore, HeLa cells stimulated as before were analysed for proRBM39, proEXT1 and proDNAJB4 levels by qRT-PCR. No substantial changes were detected for proRBM39 and proEXT1 indicating no major role of GSK-3 in regulating these PROMPTs.

**S7: Anisomycin targets the nuclear RNA exosome via RBM7**

**A.** Western Blot confirmation for transfection of GFP, GFP-RBM7 and GFP-RBM7<sup>S136A</sup> in HeLa cells used in Figure 3E. **B.** Confirmation of hRRP40 and RBM7 depletion using siRNA. HeLa cells were treated with either a Control siRNA or hRRP40- and RBM7-specific siRNAs and 48h posttransfection treated as indicated. The knockdown efficiency of hRRP40 and RBM7 was assayed by Western Blot. **C.** U snRNA metabolites of either the major (U1, U2, U4) or the minor splicing complex (U11, U12, U6atac) (non-specific detection of precursors and mature transcripts) levels were determined after 2h anisomycin stimulation and prior p38<sup>MAPK</sup>-inhibition using BIRB796.

**S8: IL-1 $\alpha$  stimulation of HeLa and osmotic shock selectively upregulate PROMPTs**

**A.** HeLa cells were stimulated with 2ng/ml IL-1 $\alpha$  for the indicated periods of time. Only the proRBM39 transcript was moderately induced in a p38-dependent manner by this stimulus. The star indicates  $p < 0.04$  (as determined by two-sided student's t-test) for the IL-1 $\alpha$ -induced upregulation of proRBM39. **B.** Osmotic stress, like IL-1 $\alpha$ , has a minor influence on

PROMPTs accumulation in HeLa cells. High osmolarity was induced by adding NaCl to a final concentration of 150mM to the medium and subsequent incubation for 60 min at 37°C in the tissue culture incubator before harvesting cells for RNA isolation. Only proEXT1 showed a weak p38<sup>MAPK</sup>-dependent response to osmotic shock that was not significant ( $p > 0.1$ , as determined by two-sided student's t-test).

**S9: Effect of the MK2-inhibitor PHA781089 on RBM39 mRNA levels and minor induction of proIFNAR1 in HEK293T cells**

**A.** RBM39 mRNA increases moderately in response to anisomycin and is only in part sensitive to MK2-inhibitor PHA781089 pre-treatment. **B.** proIFNAR1 is only weakly accumulating in HEK293T cells upon anisomycin stimulation. For comparison the accumulation of proRBM39 is shown in the same experimental setup.

**S10: proEXT1 and U snRNA metabolites are significantly stabilized upon anisomycin stimulation**

**A.** proEXT1 decay kinetics after stimulating HeLa cells with Anisomycin for 2h. **B.** U snRNAs from both the major and the minor splicing complex were stabilized by stress in a p38-dependent manner. Similar to Figure 6E and F the half-lives of U1 and U11 snRNAs were determined in HeLa cells. Like the PROMPTs, U snRNAs were stabilized upon stress in a p38-dependent manner.

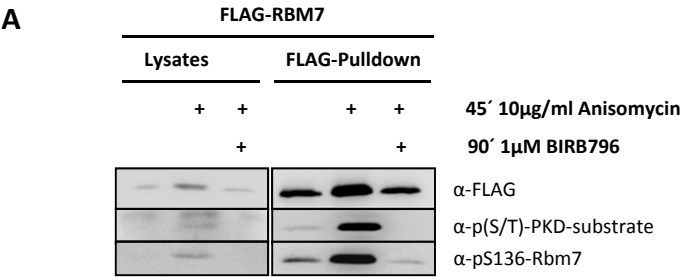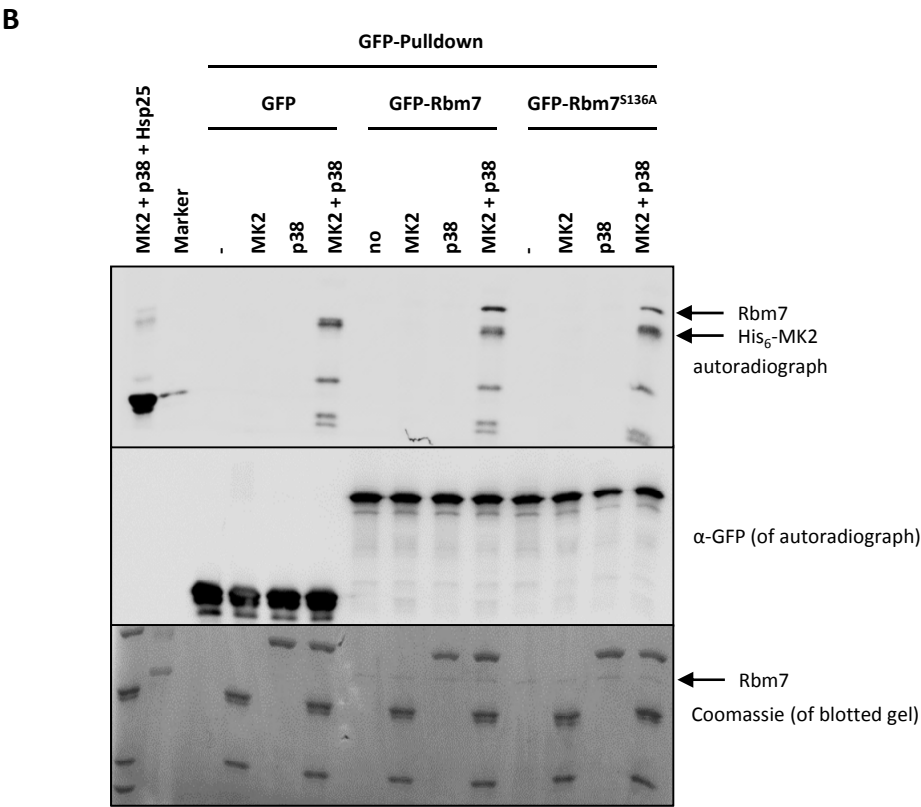

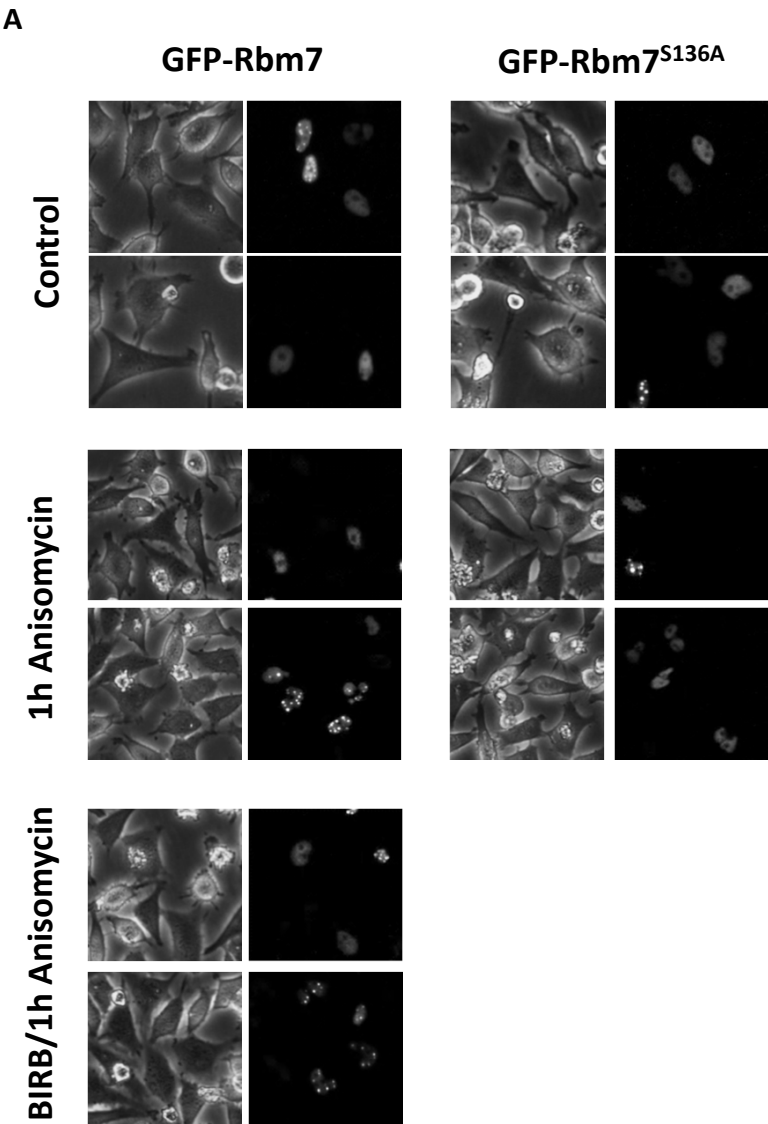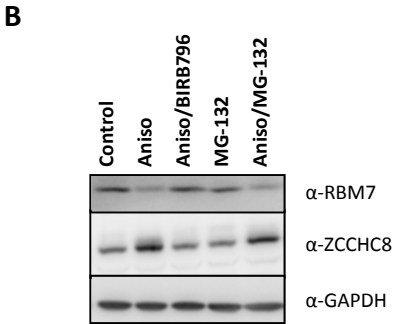

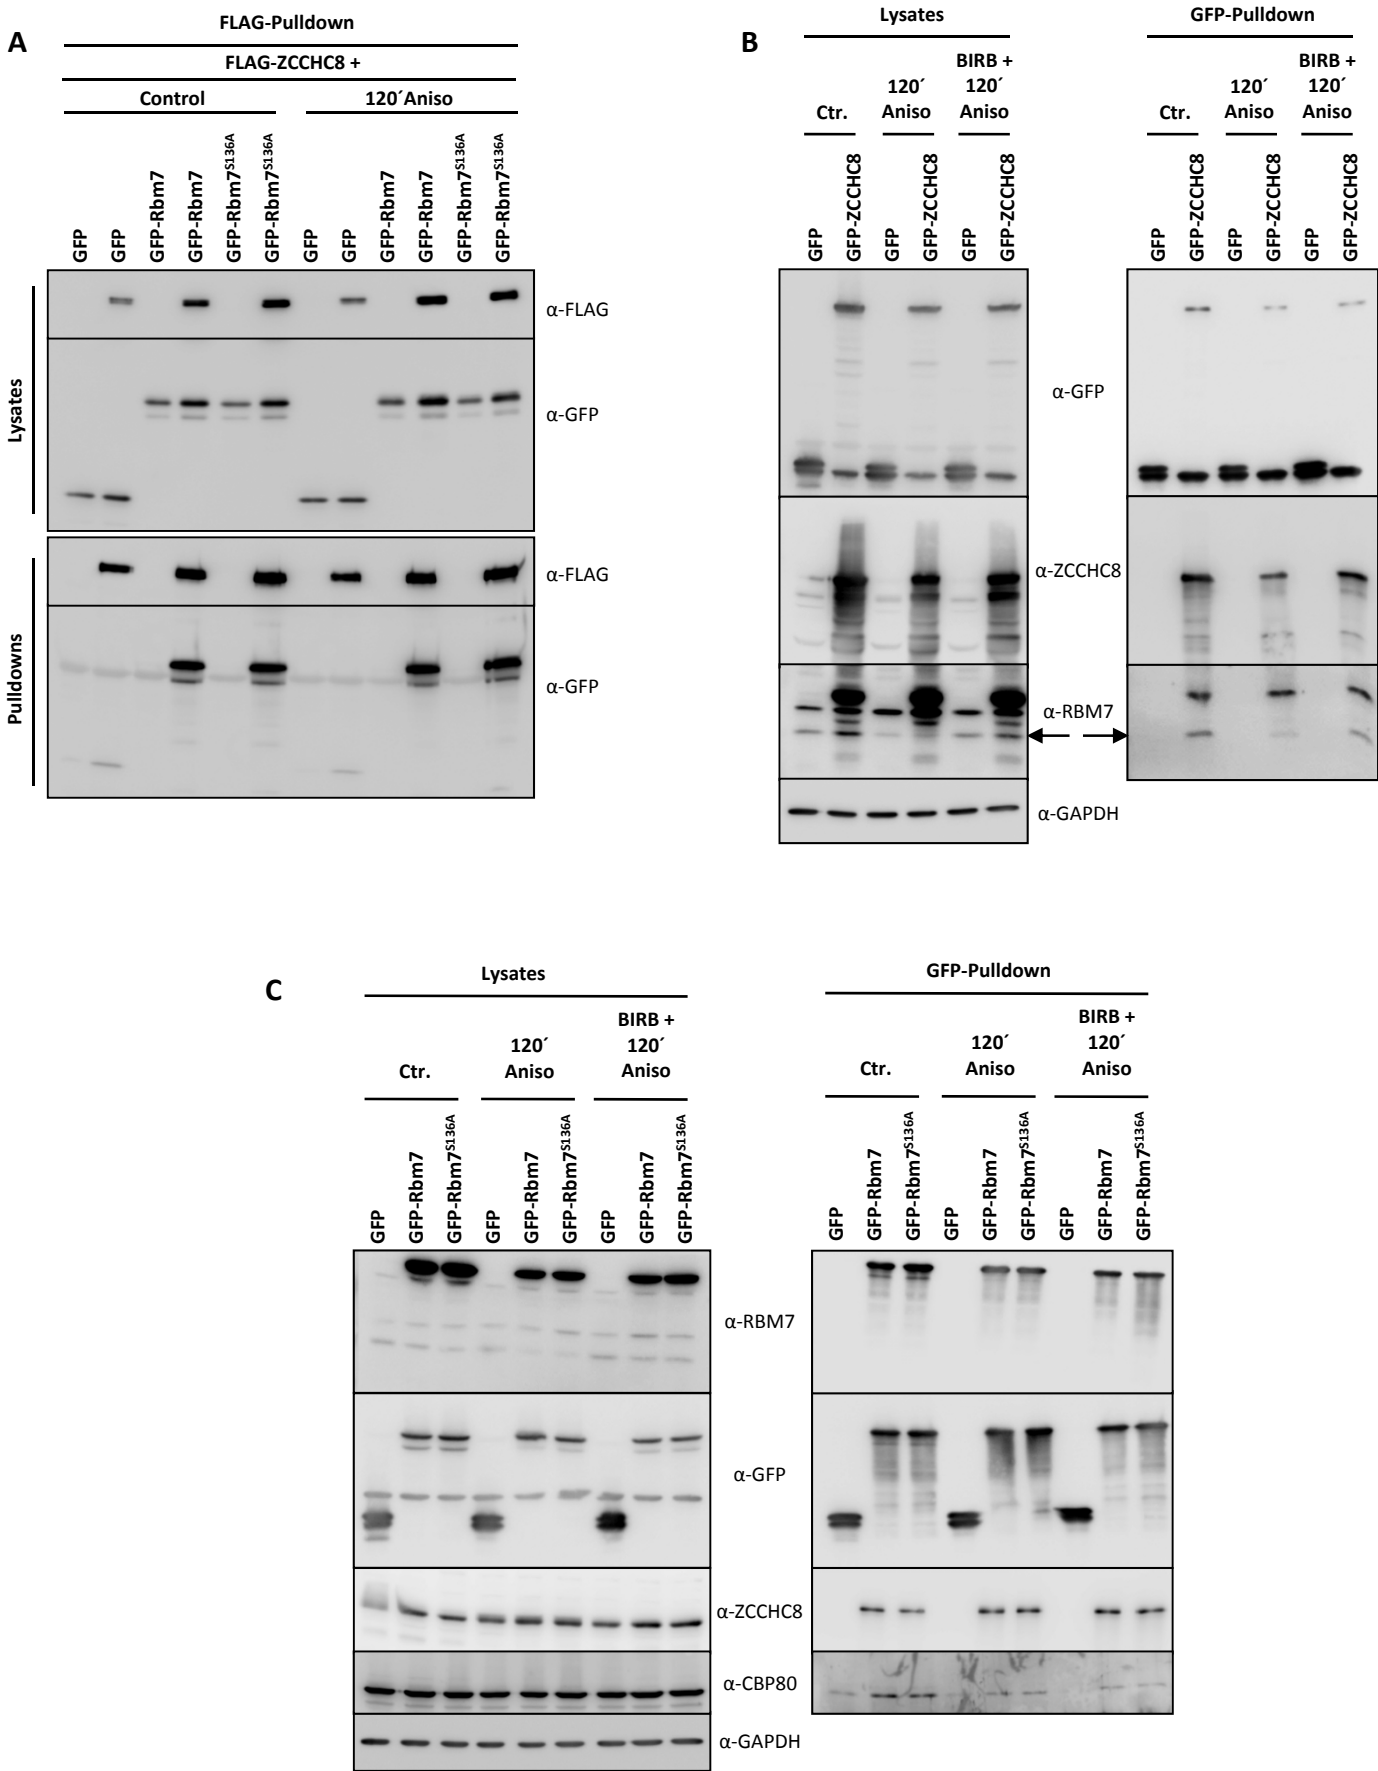

A

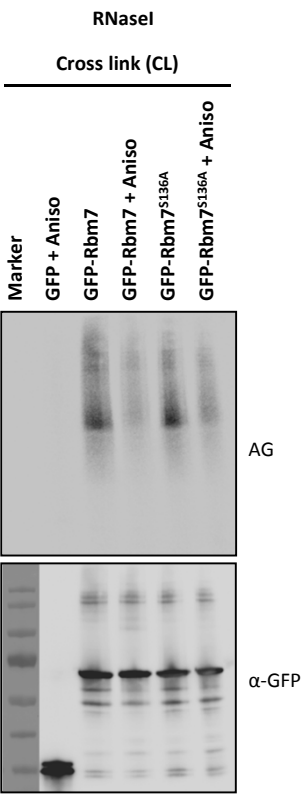

B

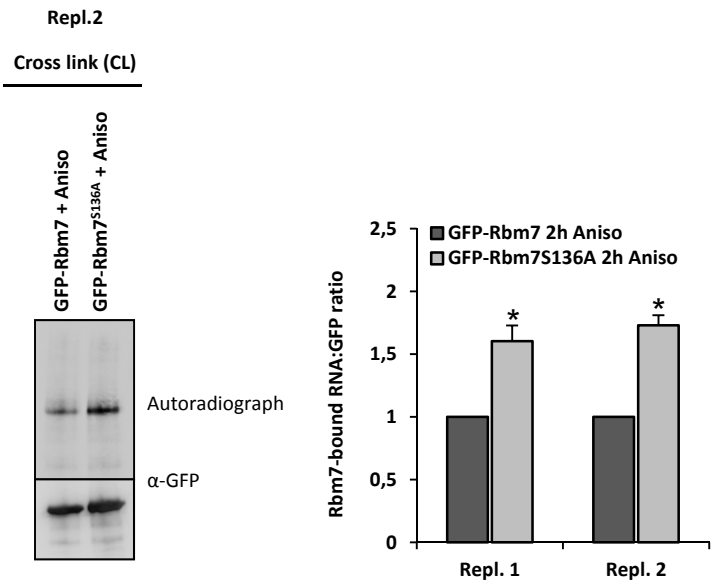

C

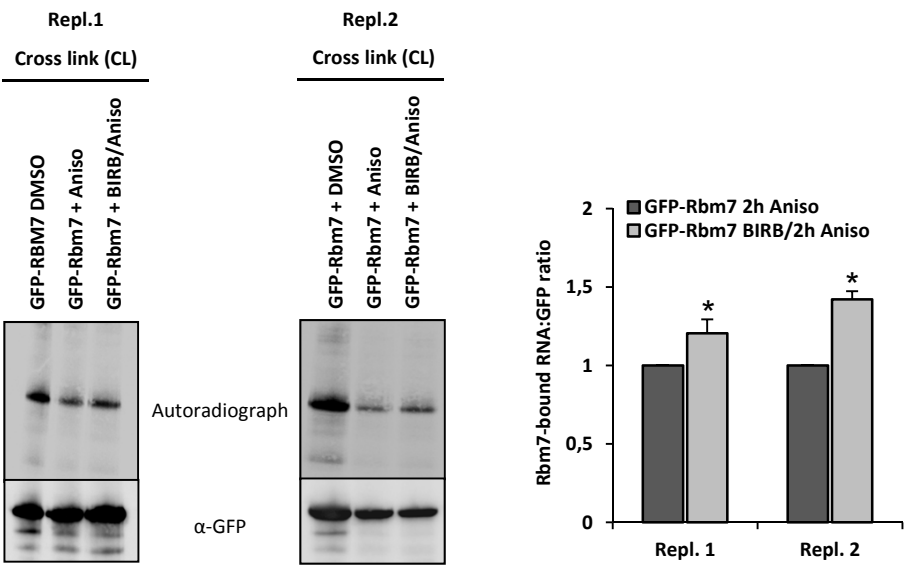

A

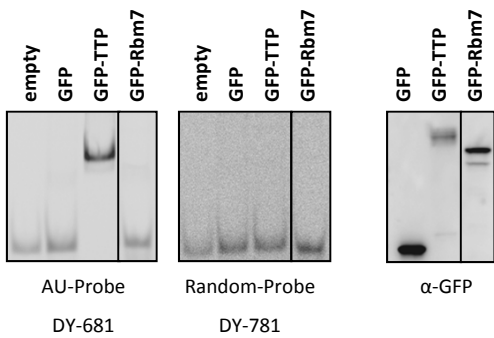

B

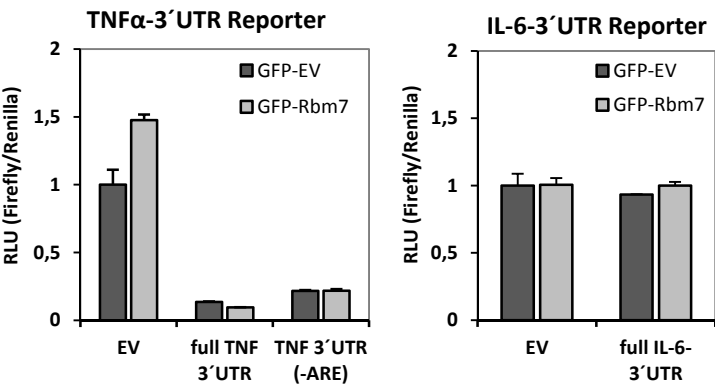

A

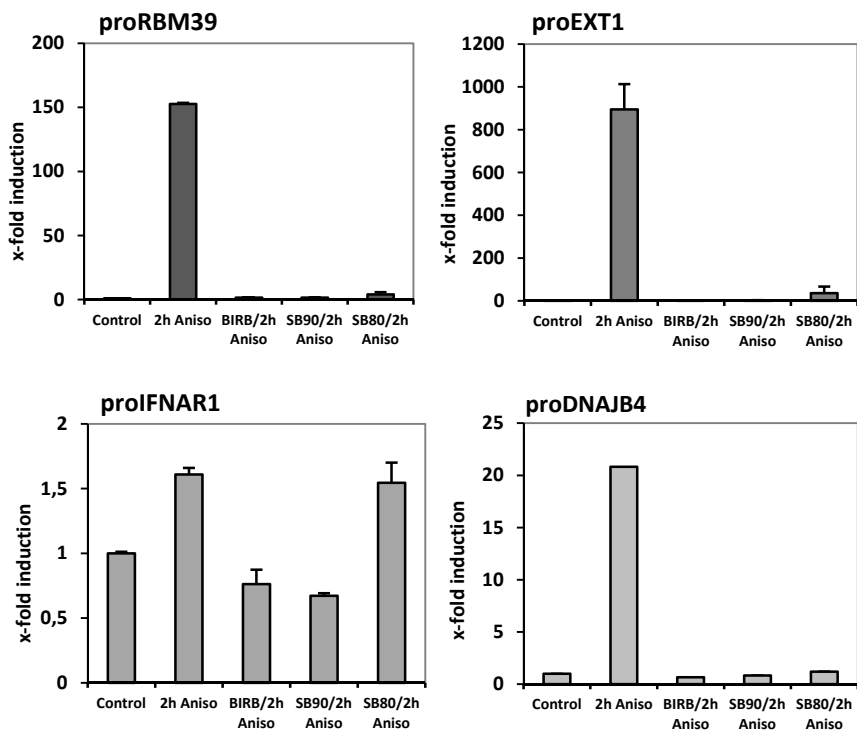

B

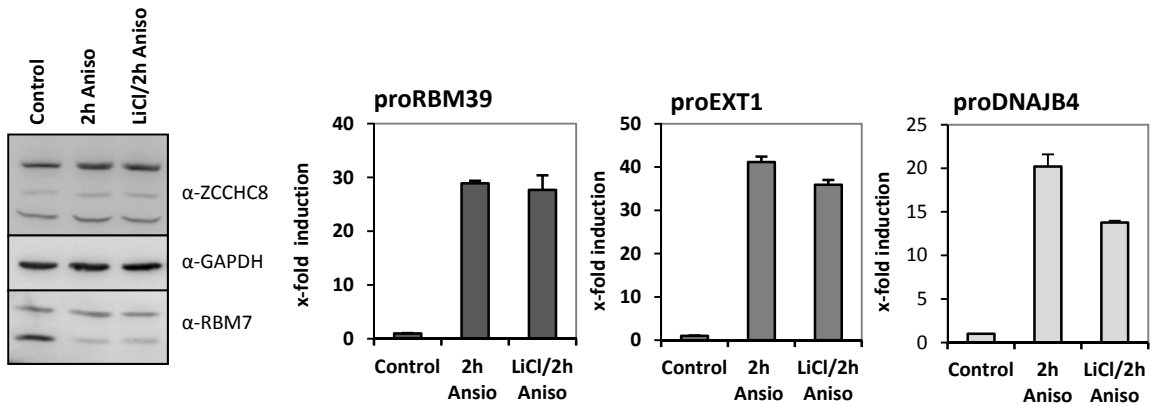

A

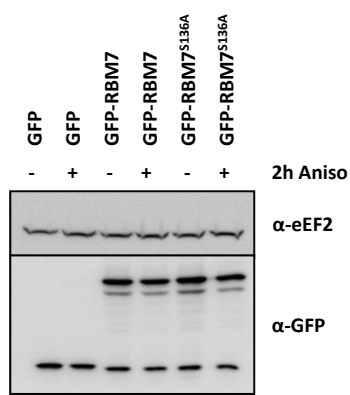

B

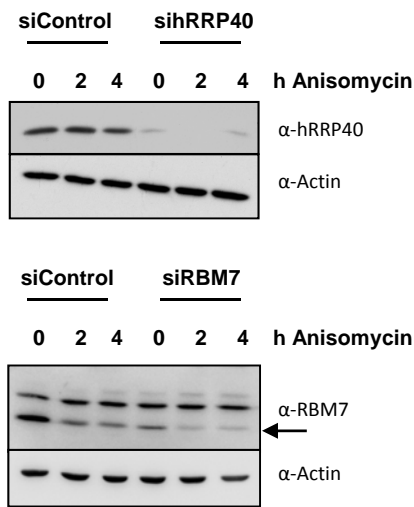

C

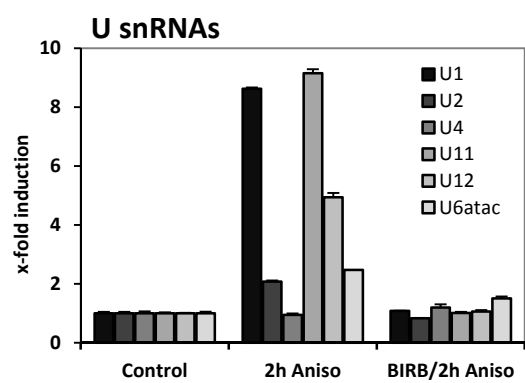

A

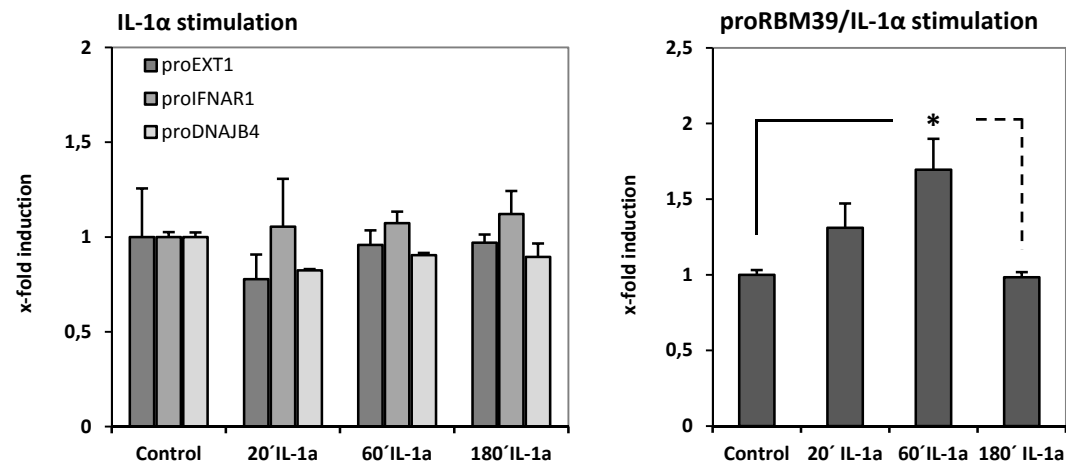

B

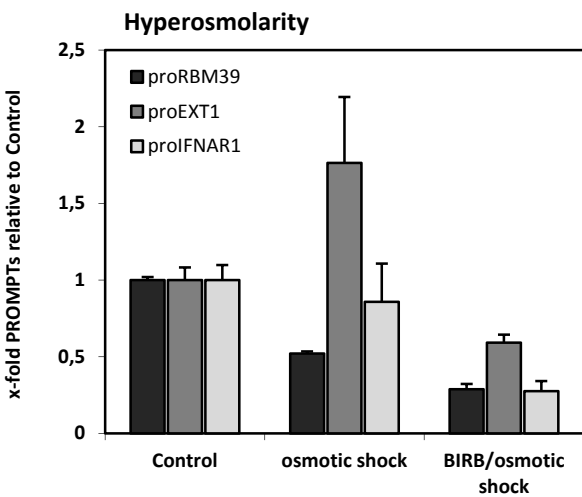

A

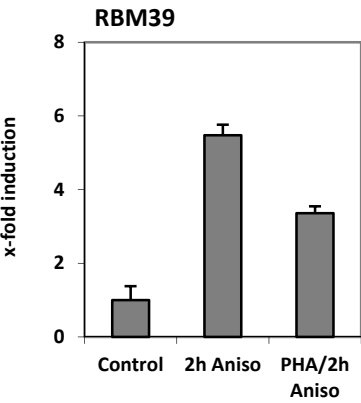

B

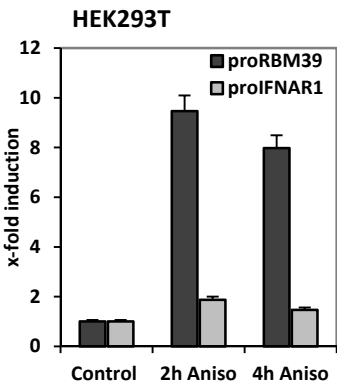

A

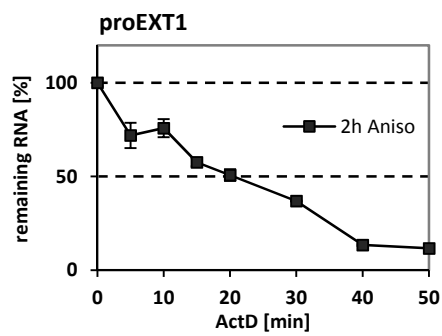

B

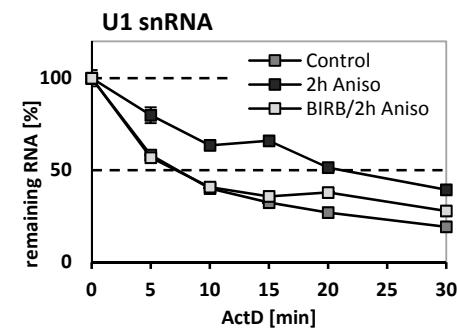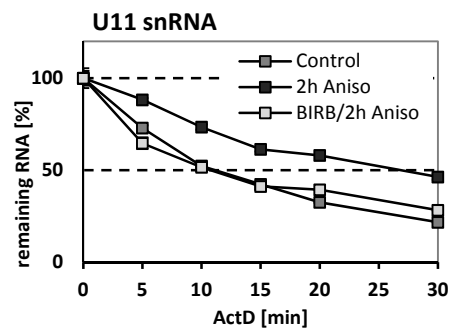

Supplement: supp_048090.114_SuppMaterial_PROMPTs.pdf [file supp_048090.114_SuppMaterial_PROMPTs.pdf]
